# Supplementary figures and images for: Prognostic and Functional Significant of Heat Shock Proteins (HSPs) in Breast Cancer Unveiled by Multi-Omics Approaches
Source: MDPI journal article supplement (doi:10.3390/biology10030247), 2021-03-22

**A**

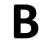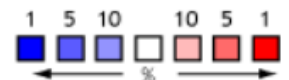

Figure S1

C

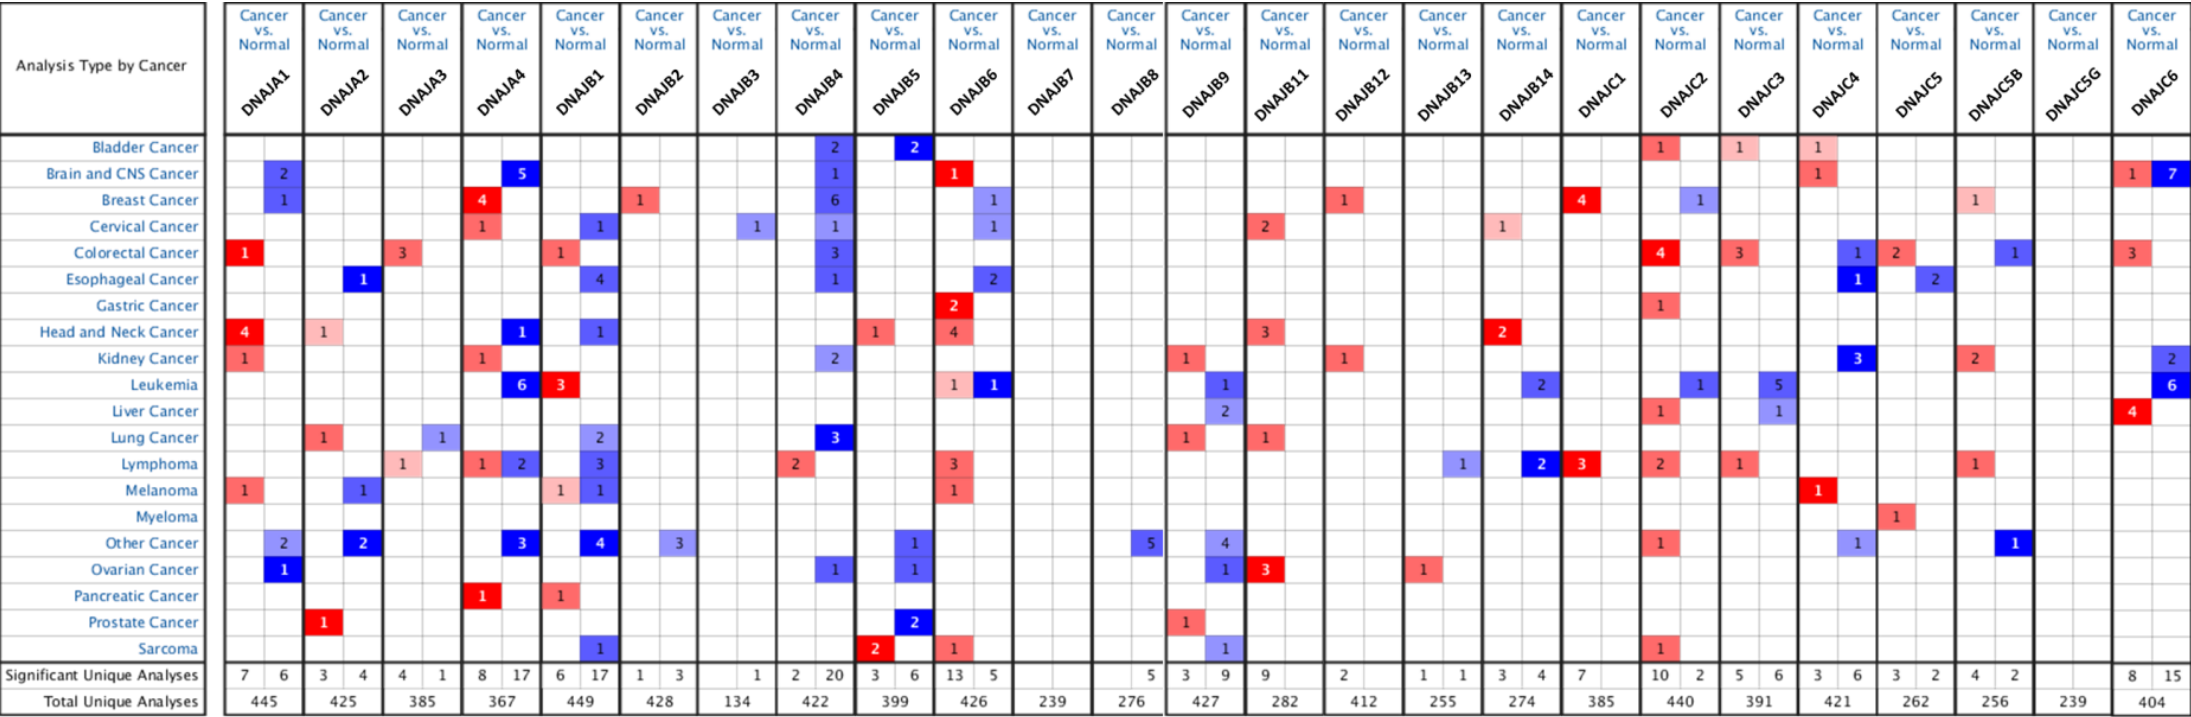

D

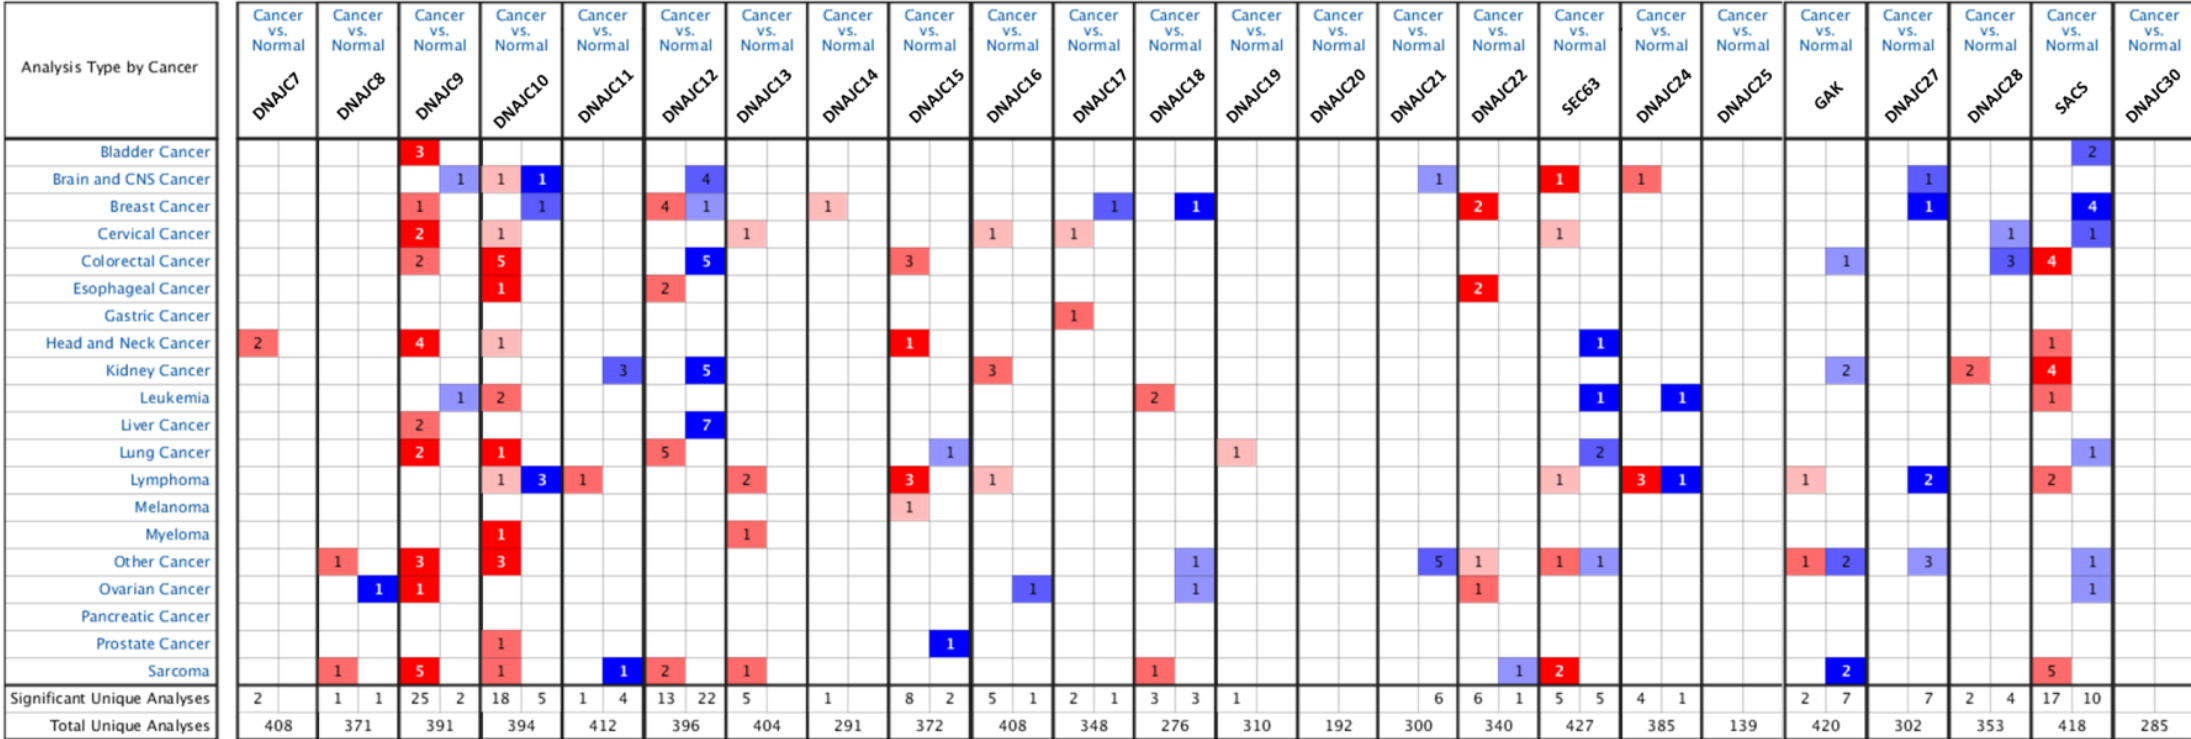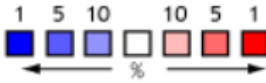

Supplement: s1 [file s1]

Figure S4

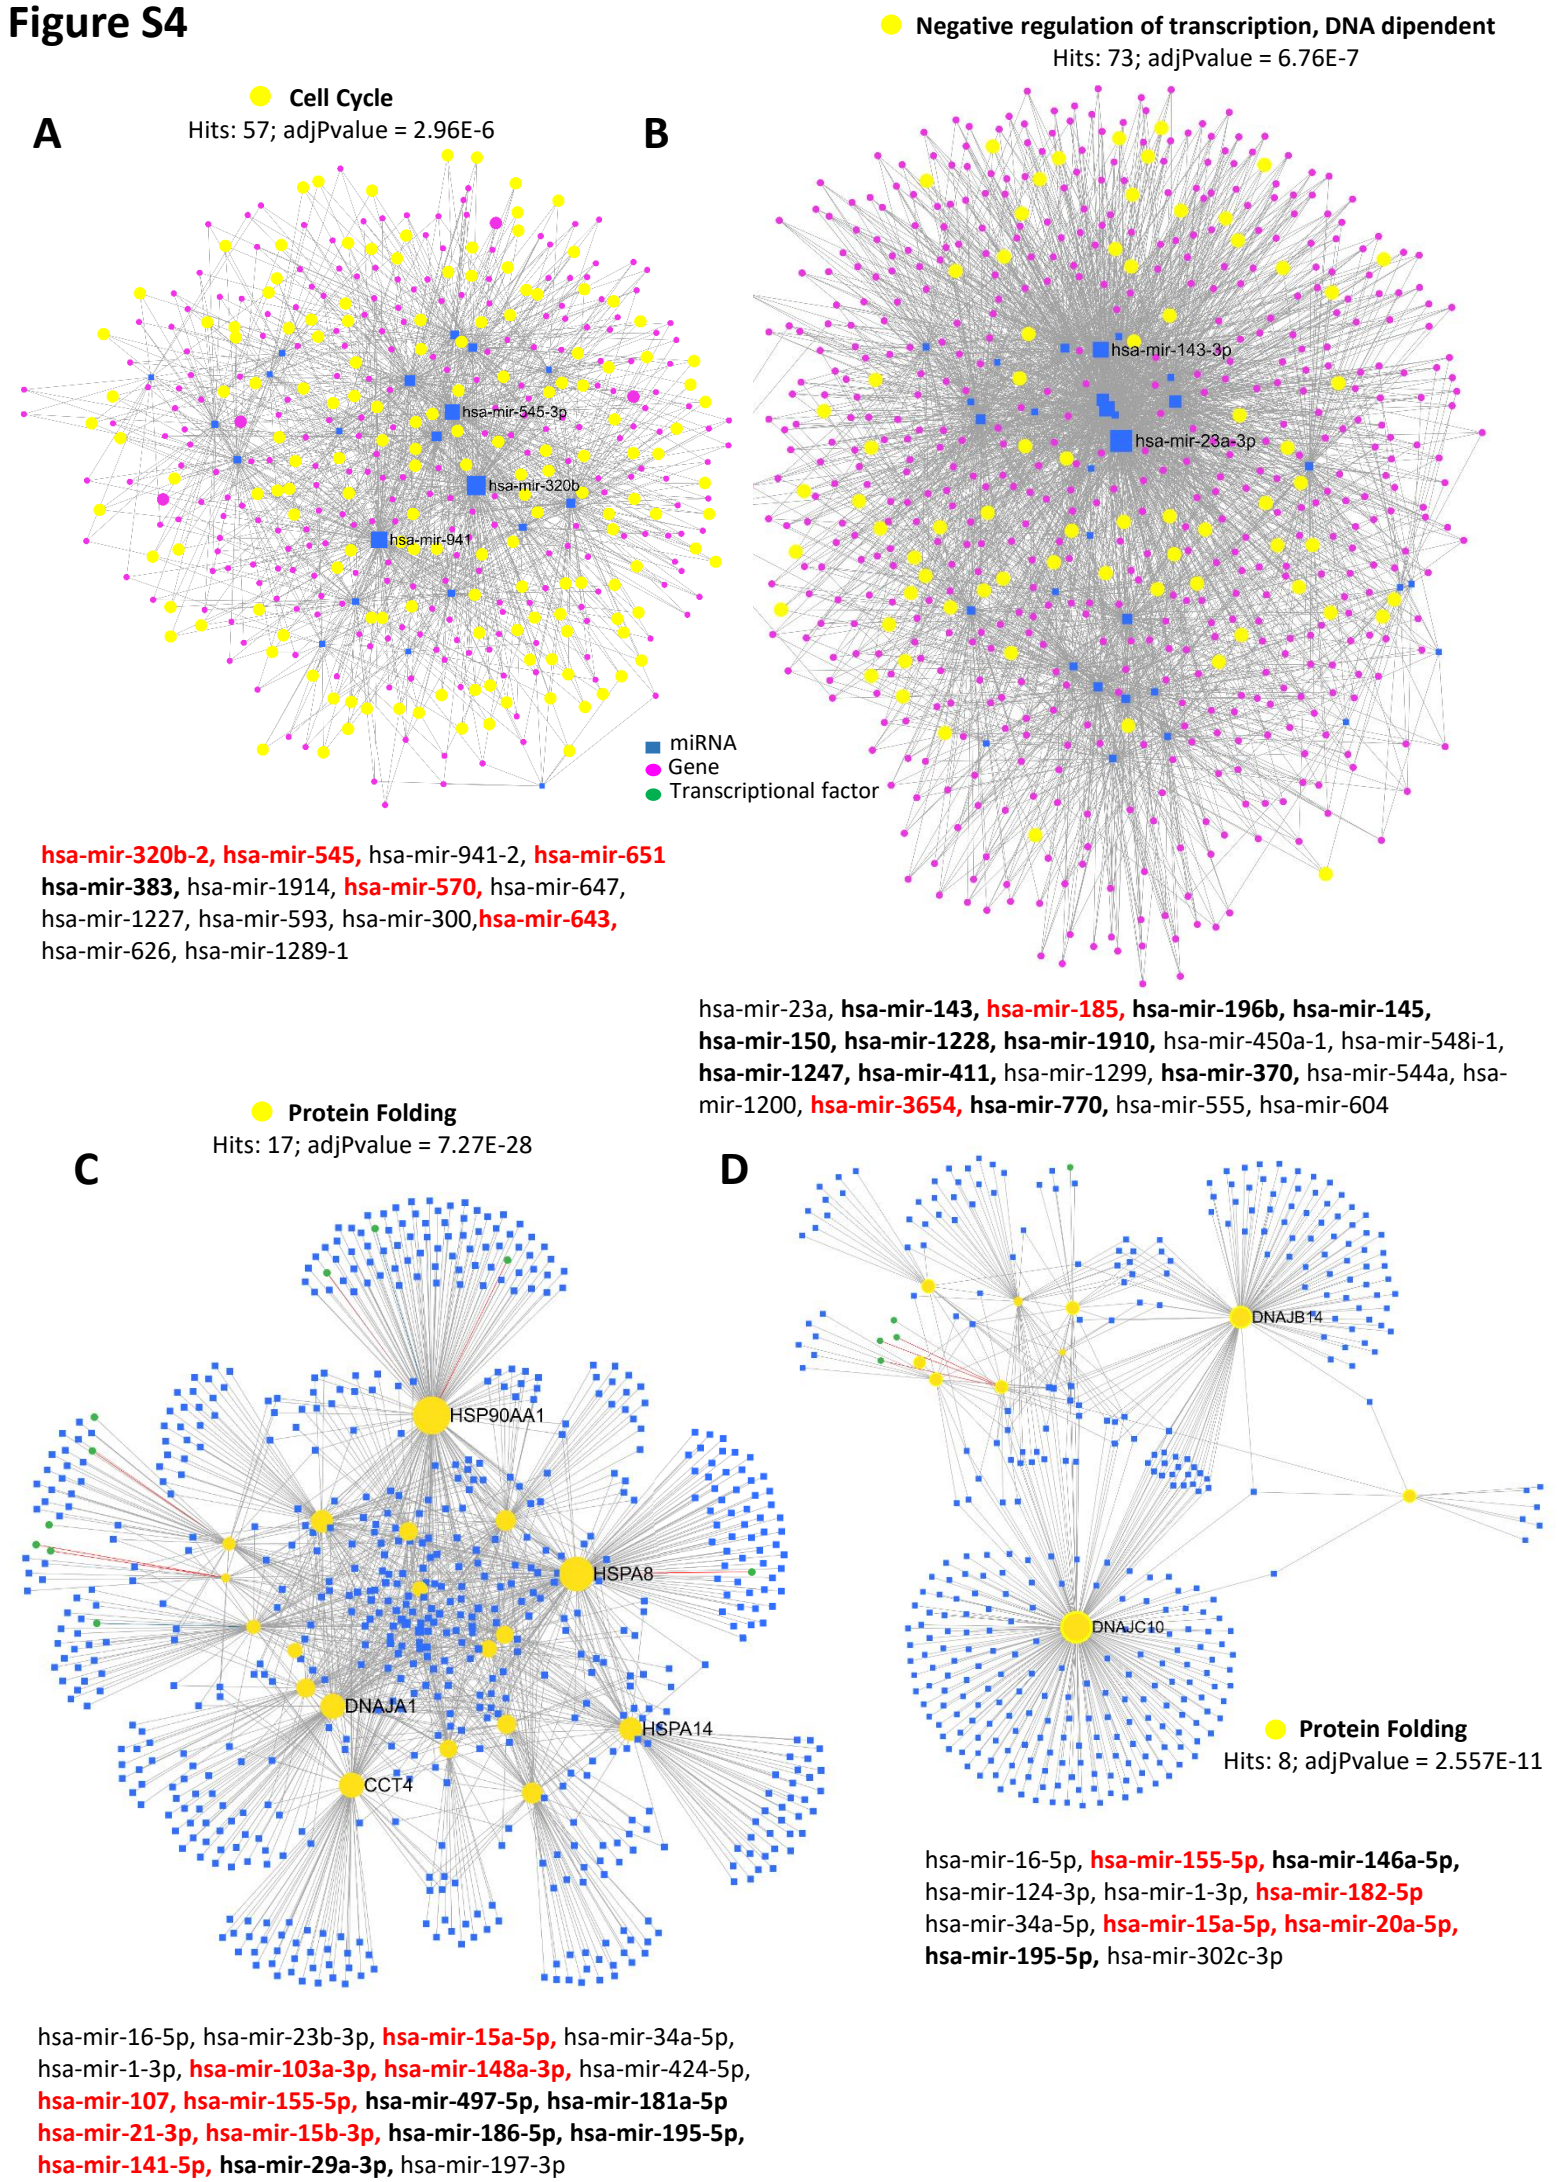

Supplement: s1 [file s1]

Figure S2

A

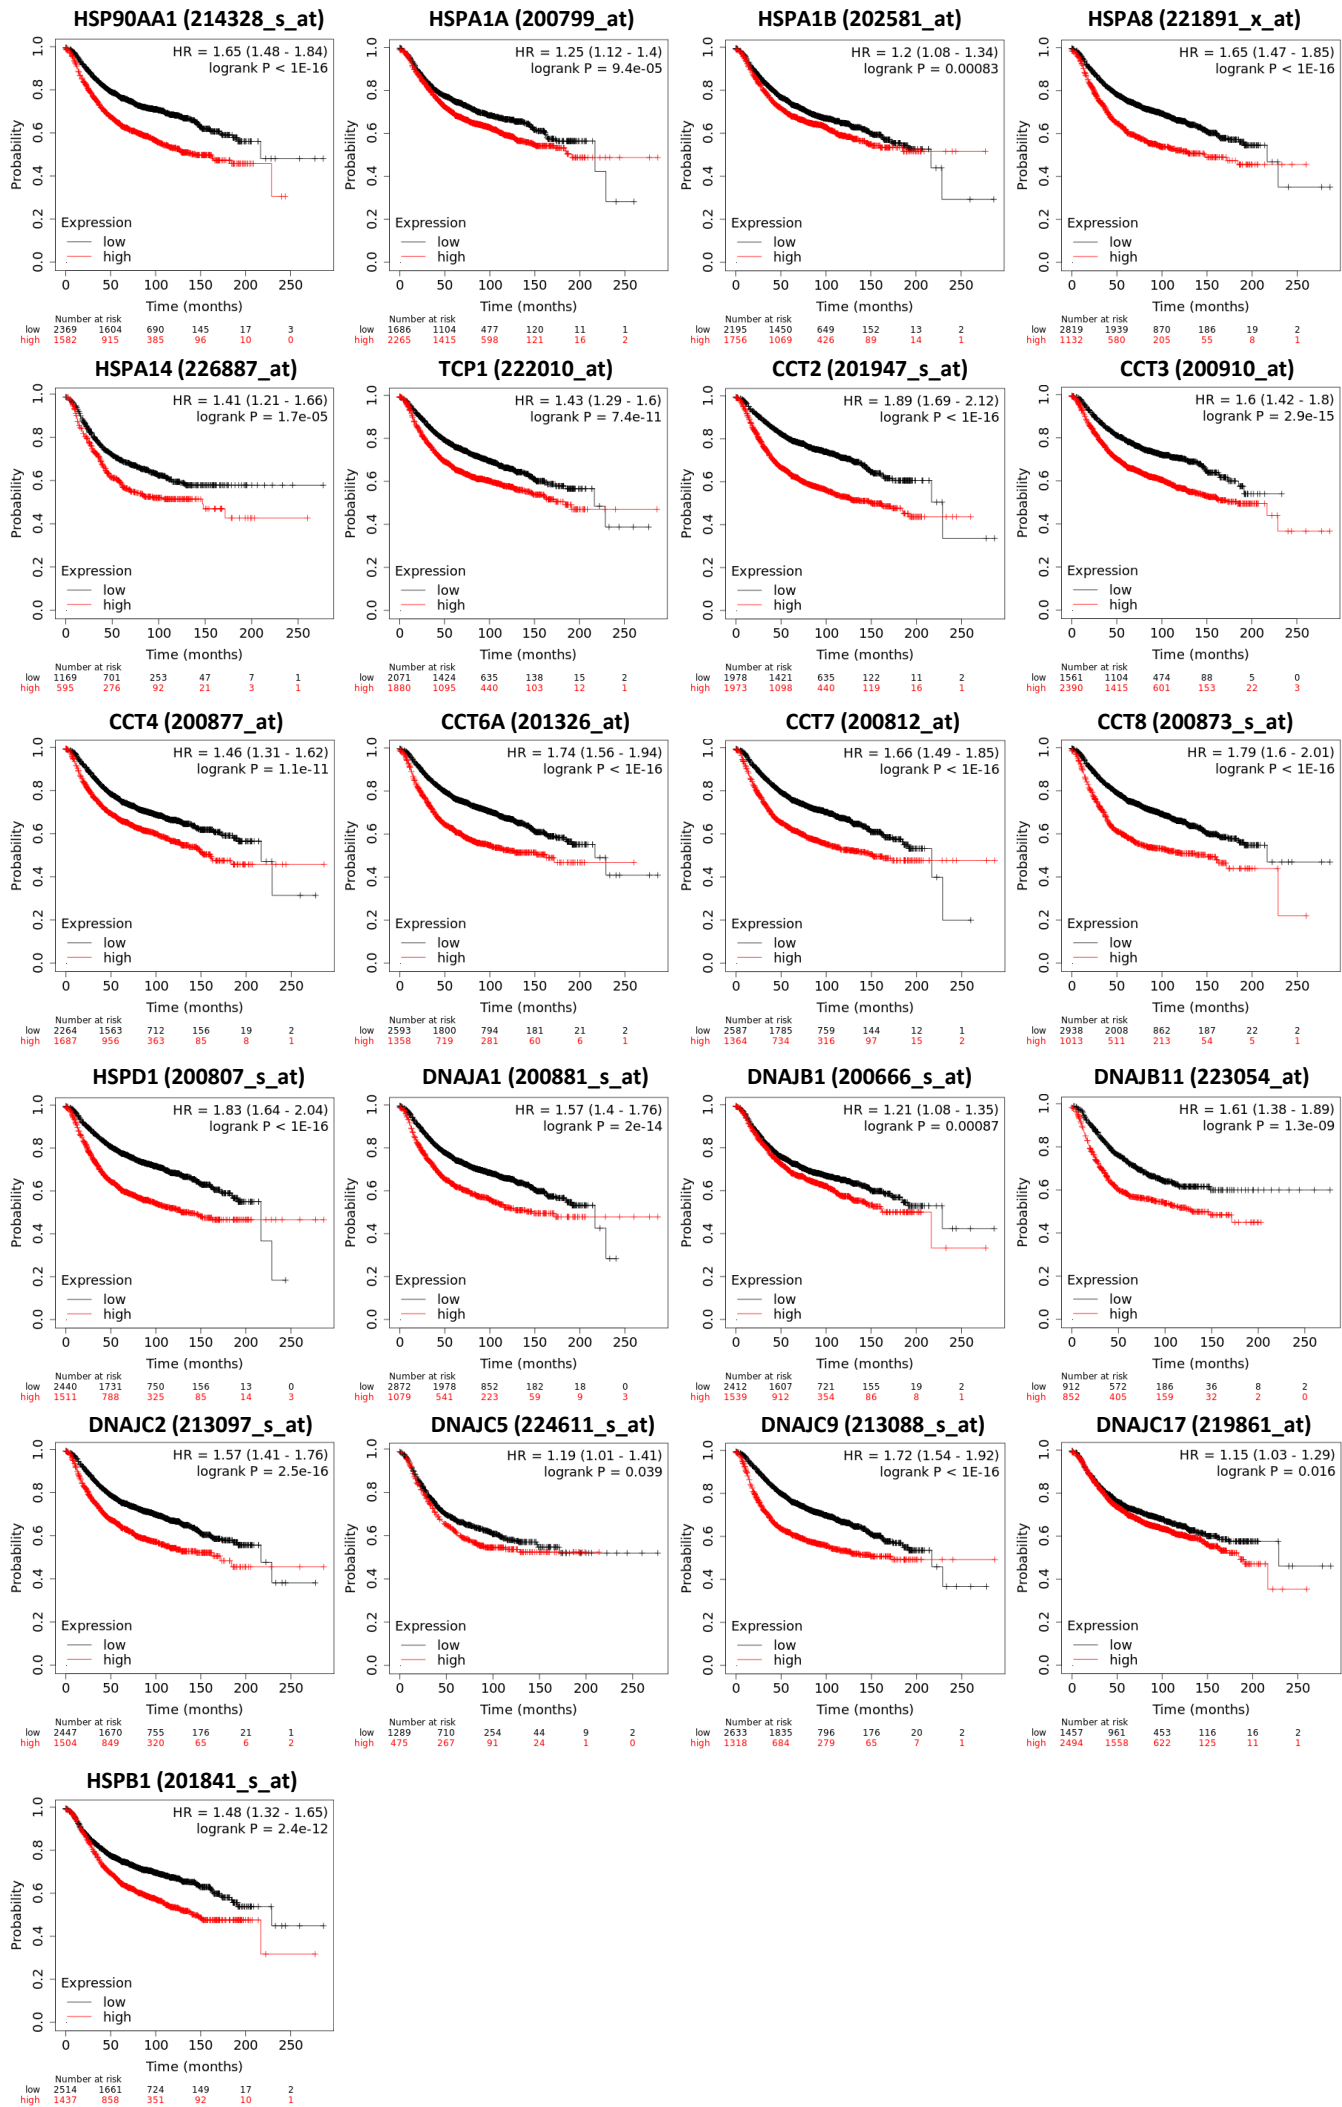

Figure S2

B

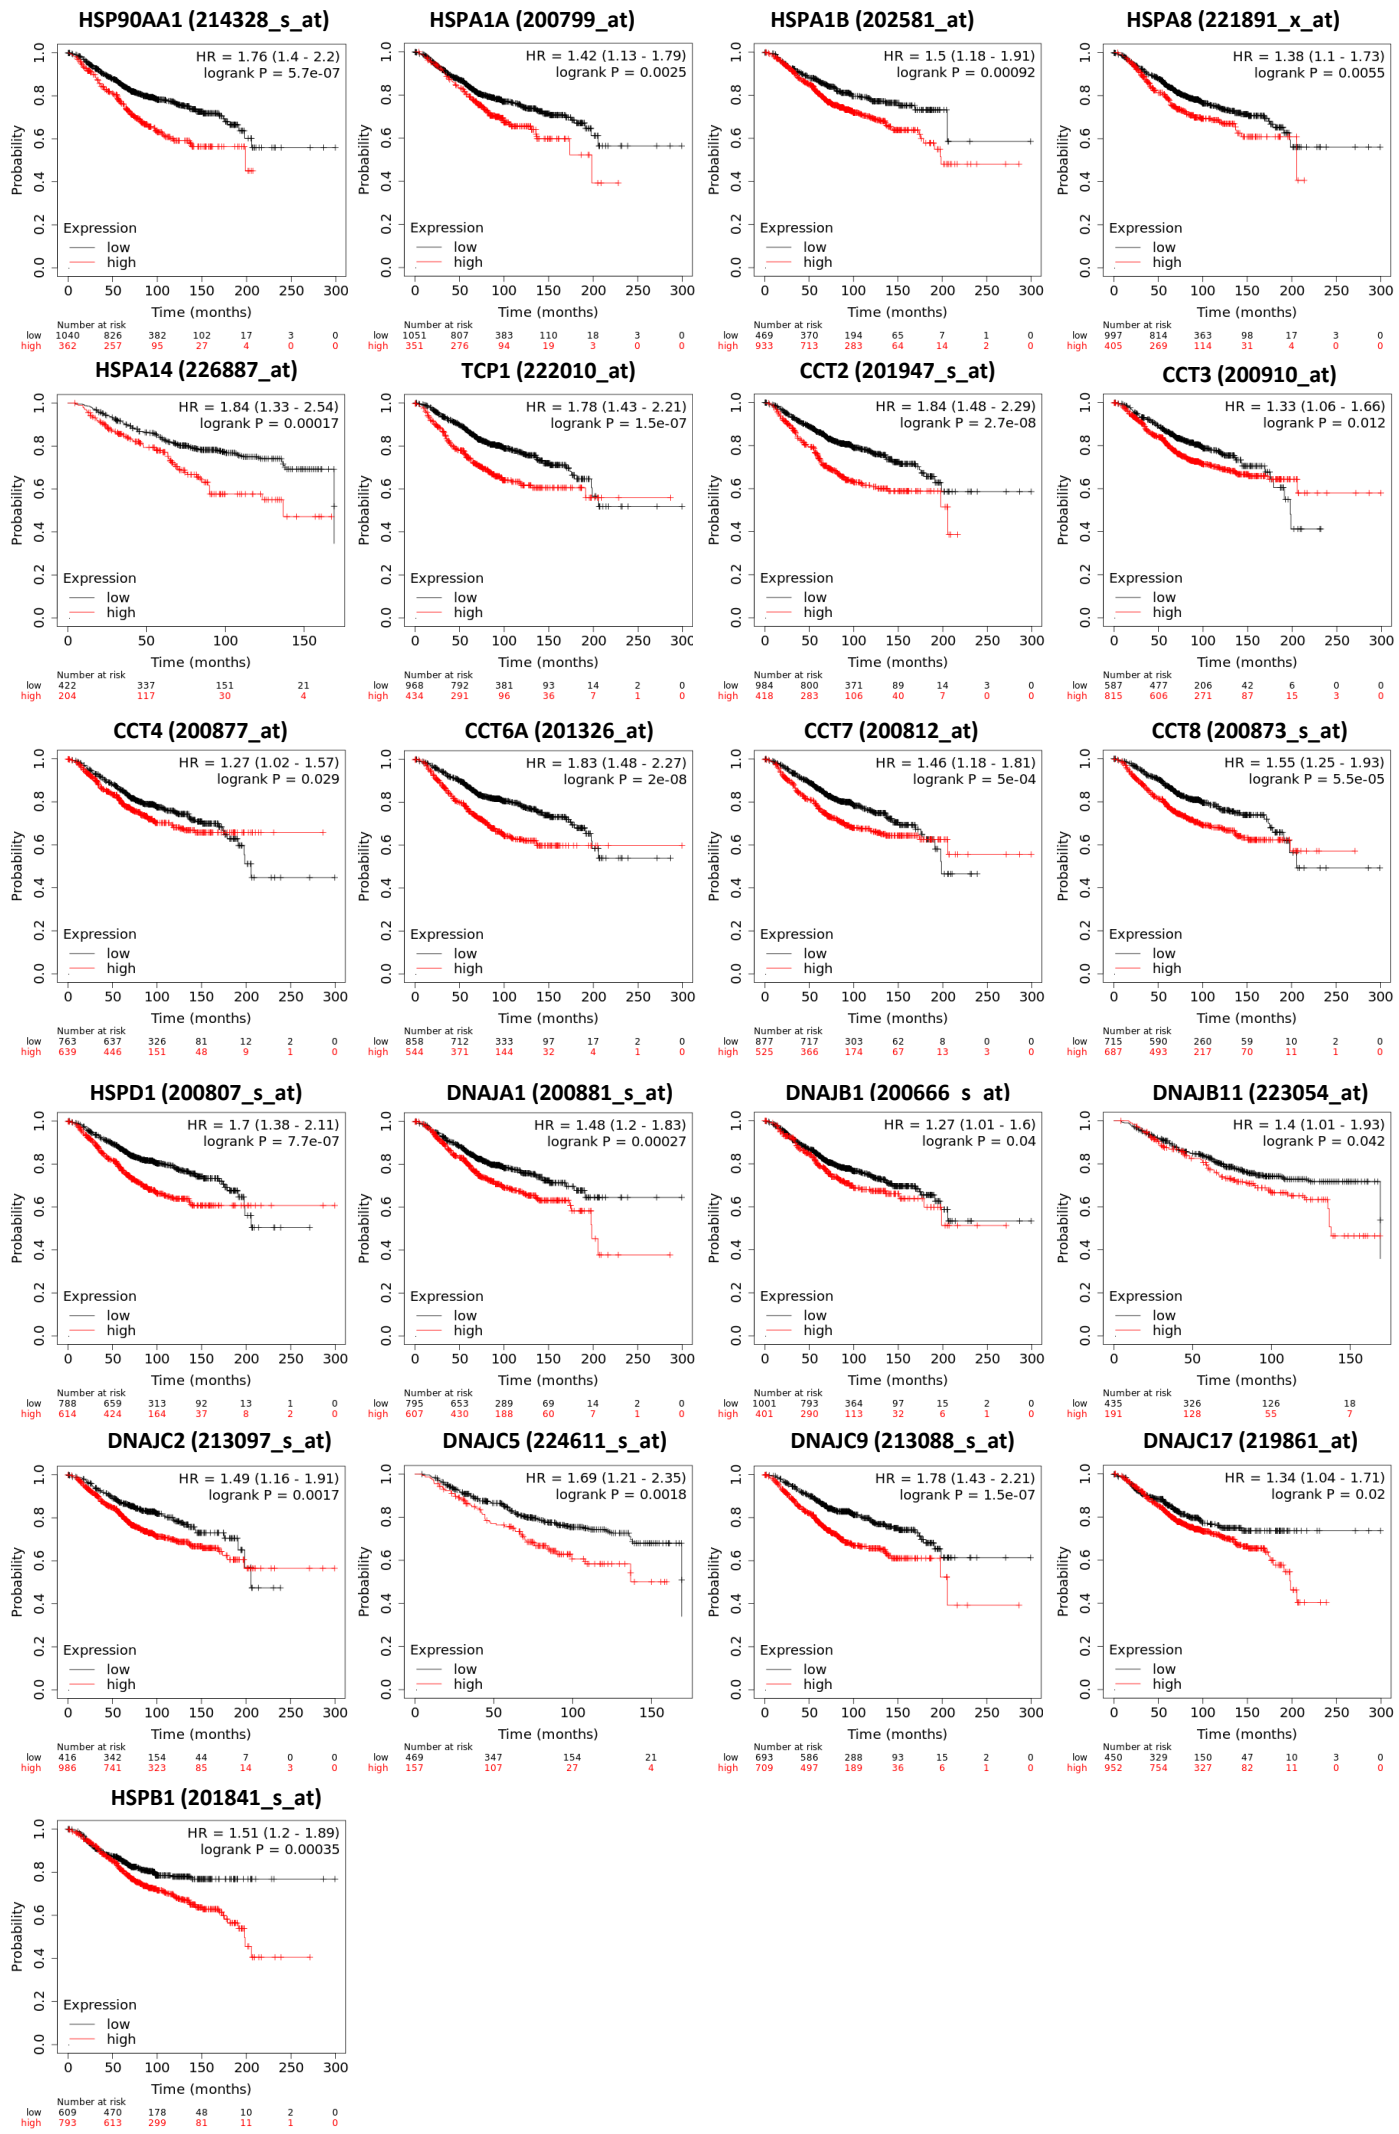

Figure S2

C

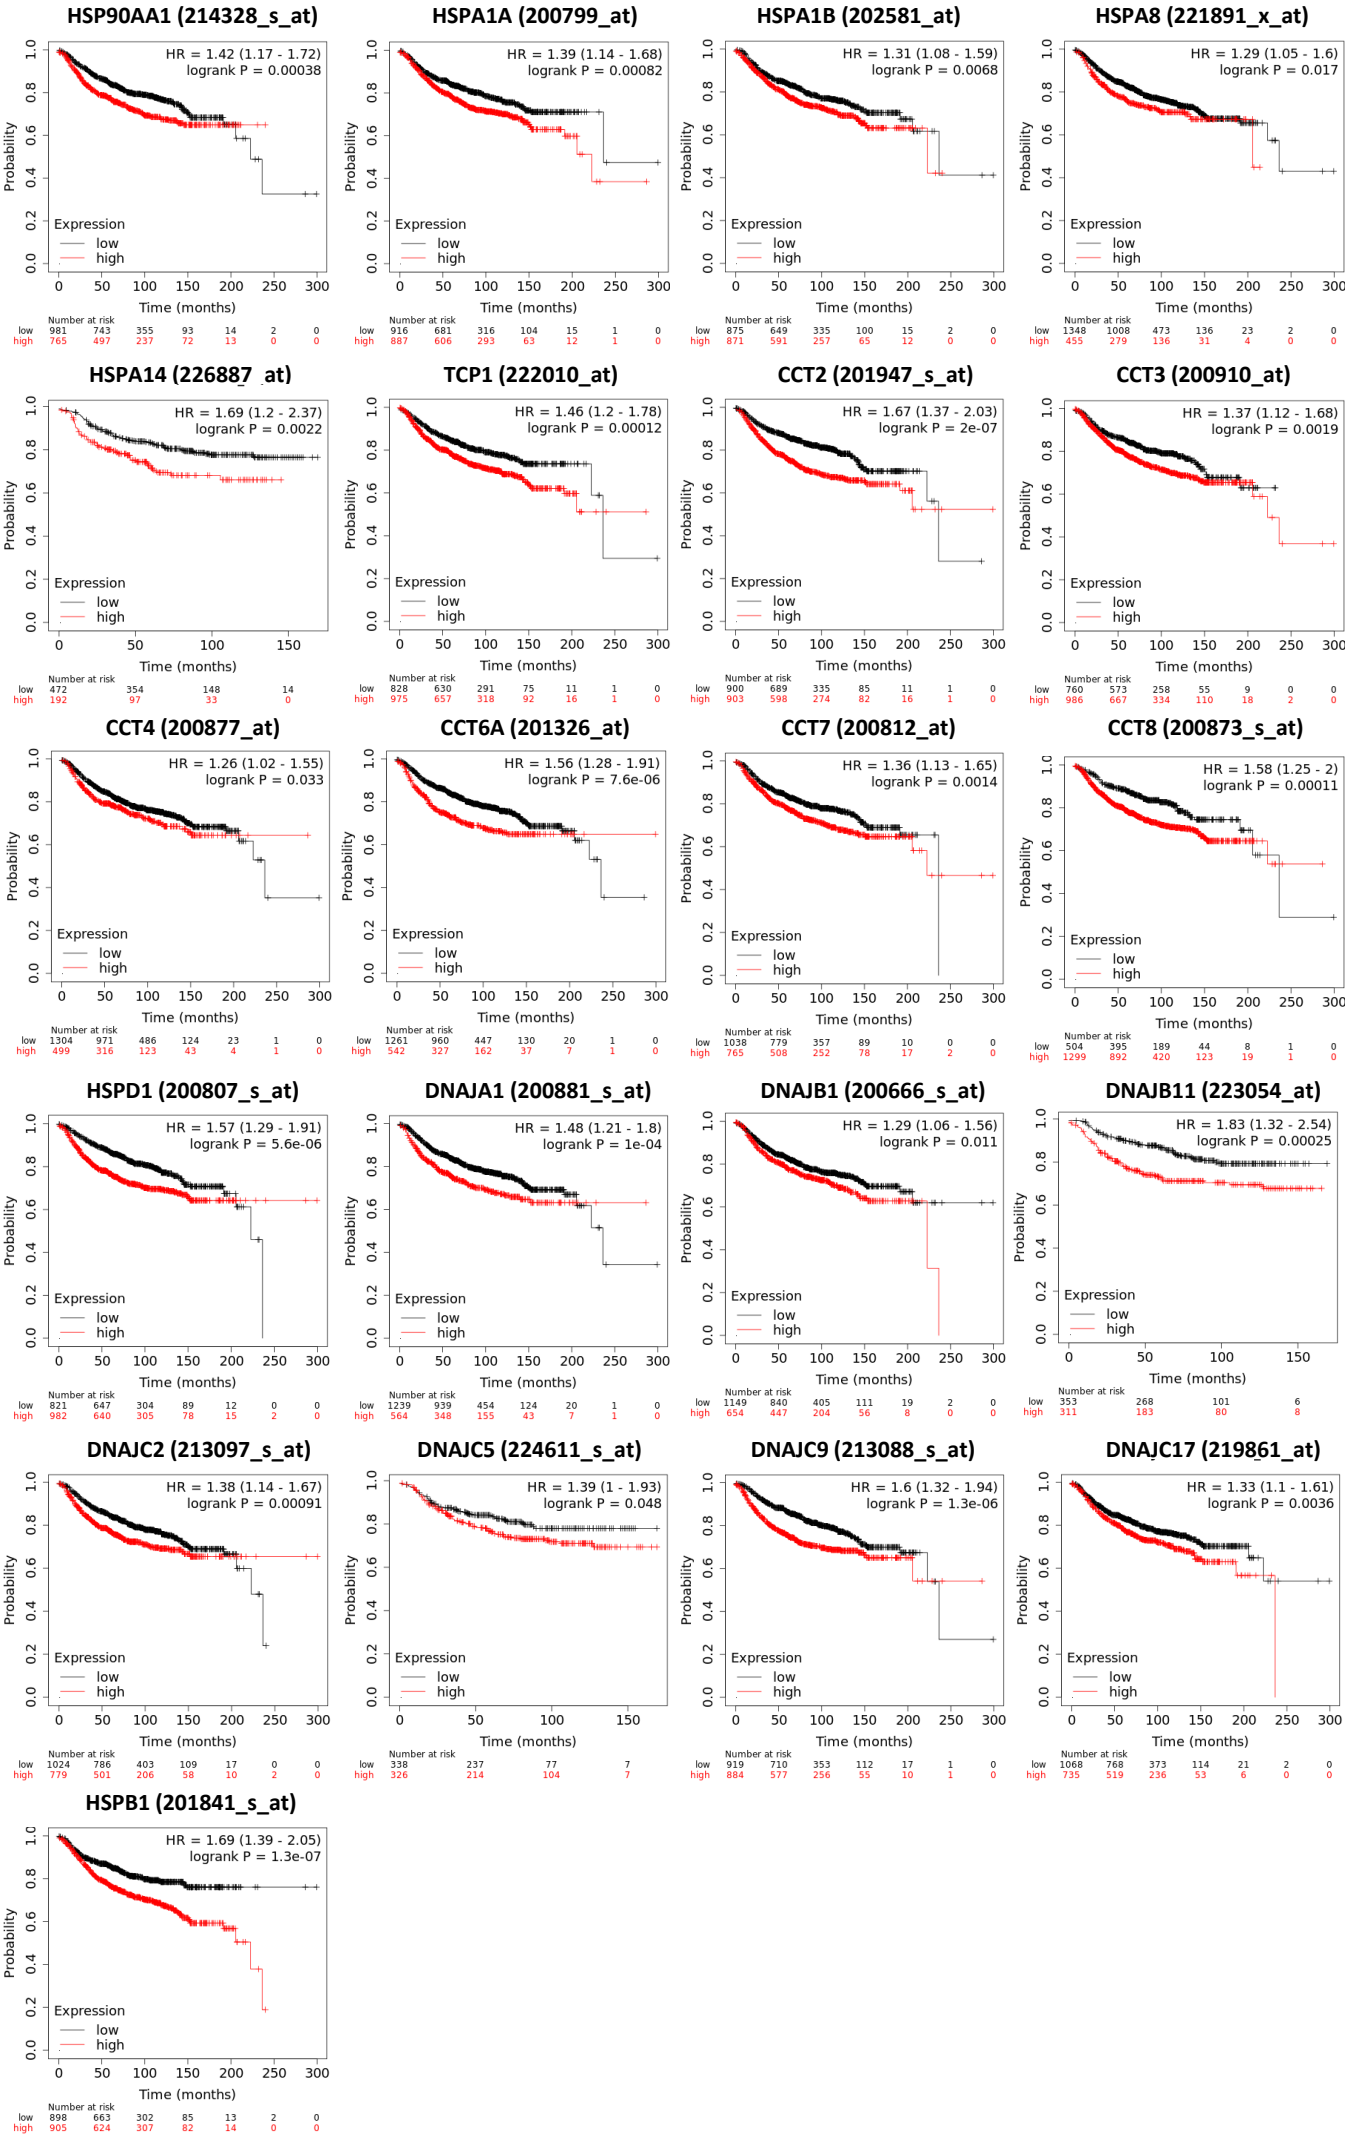

Figure S2

D

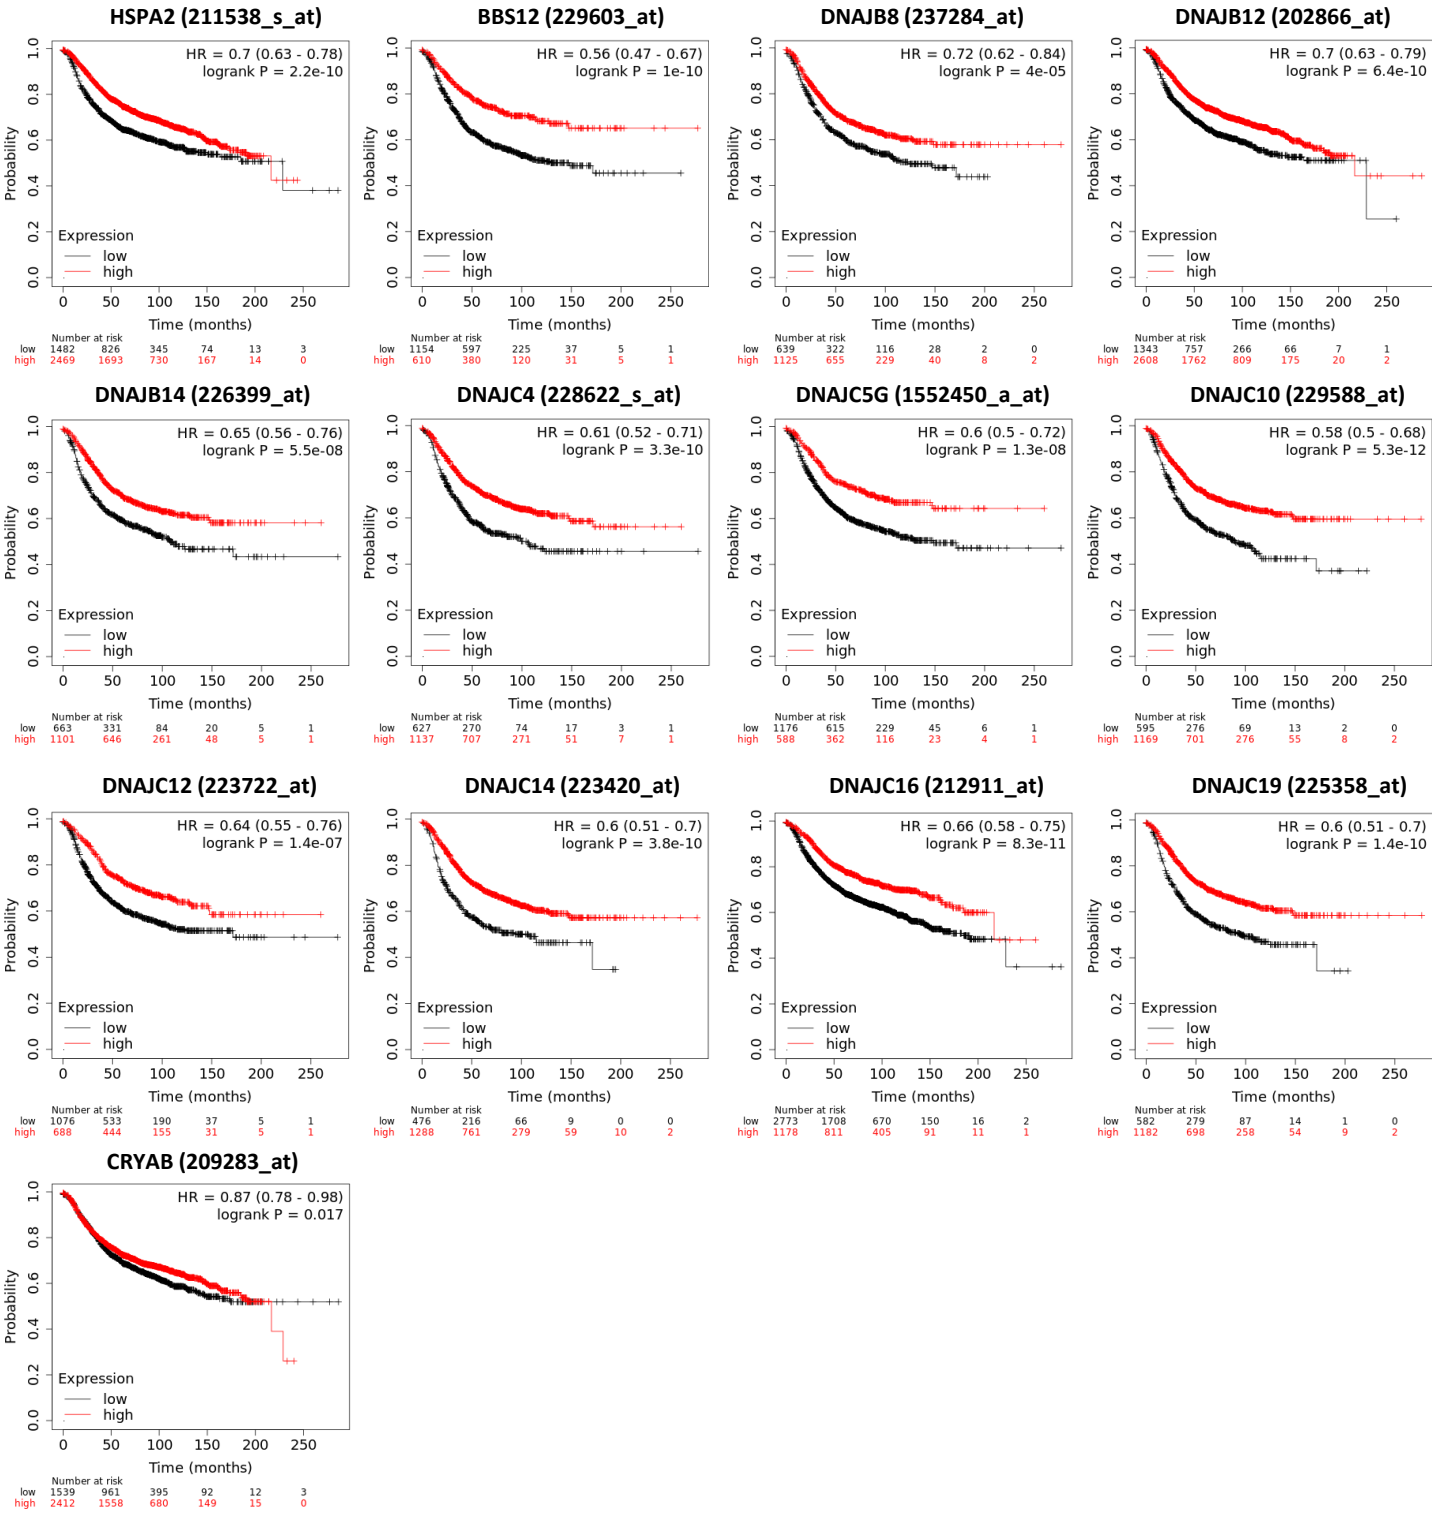

Figure S2

E

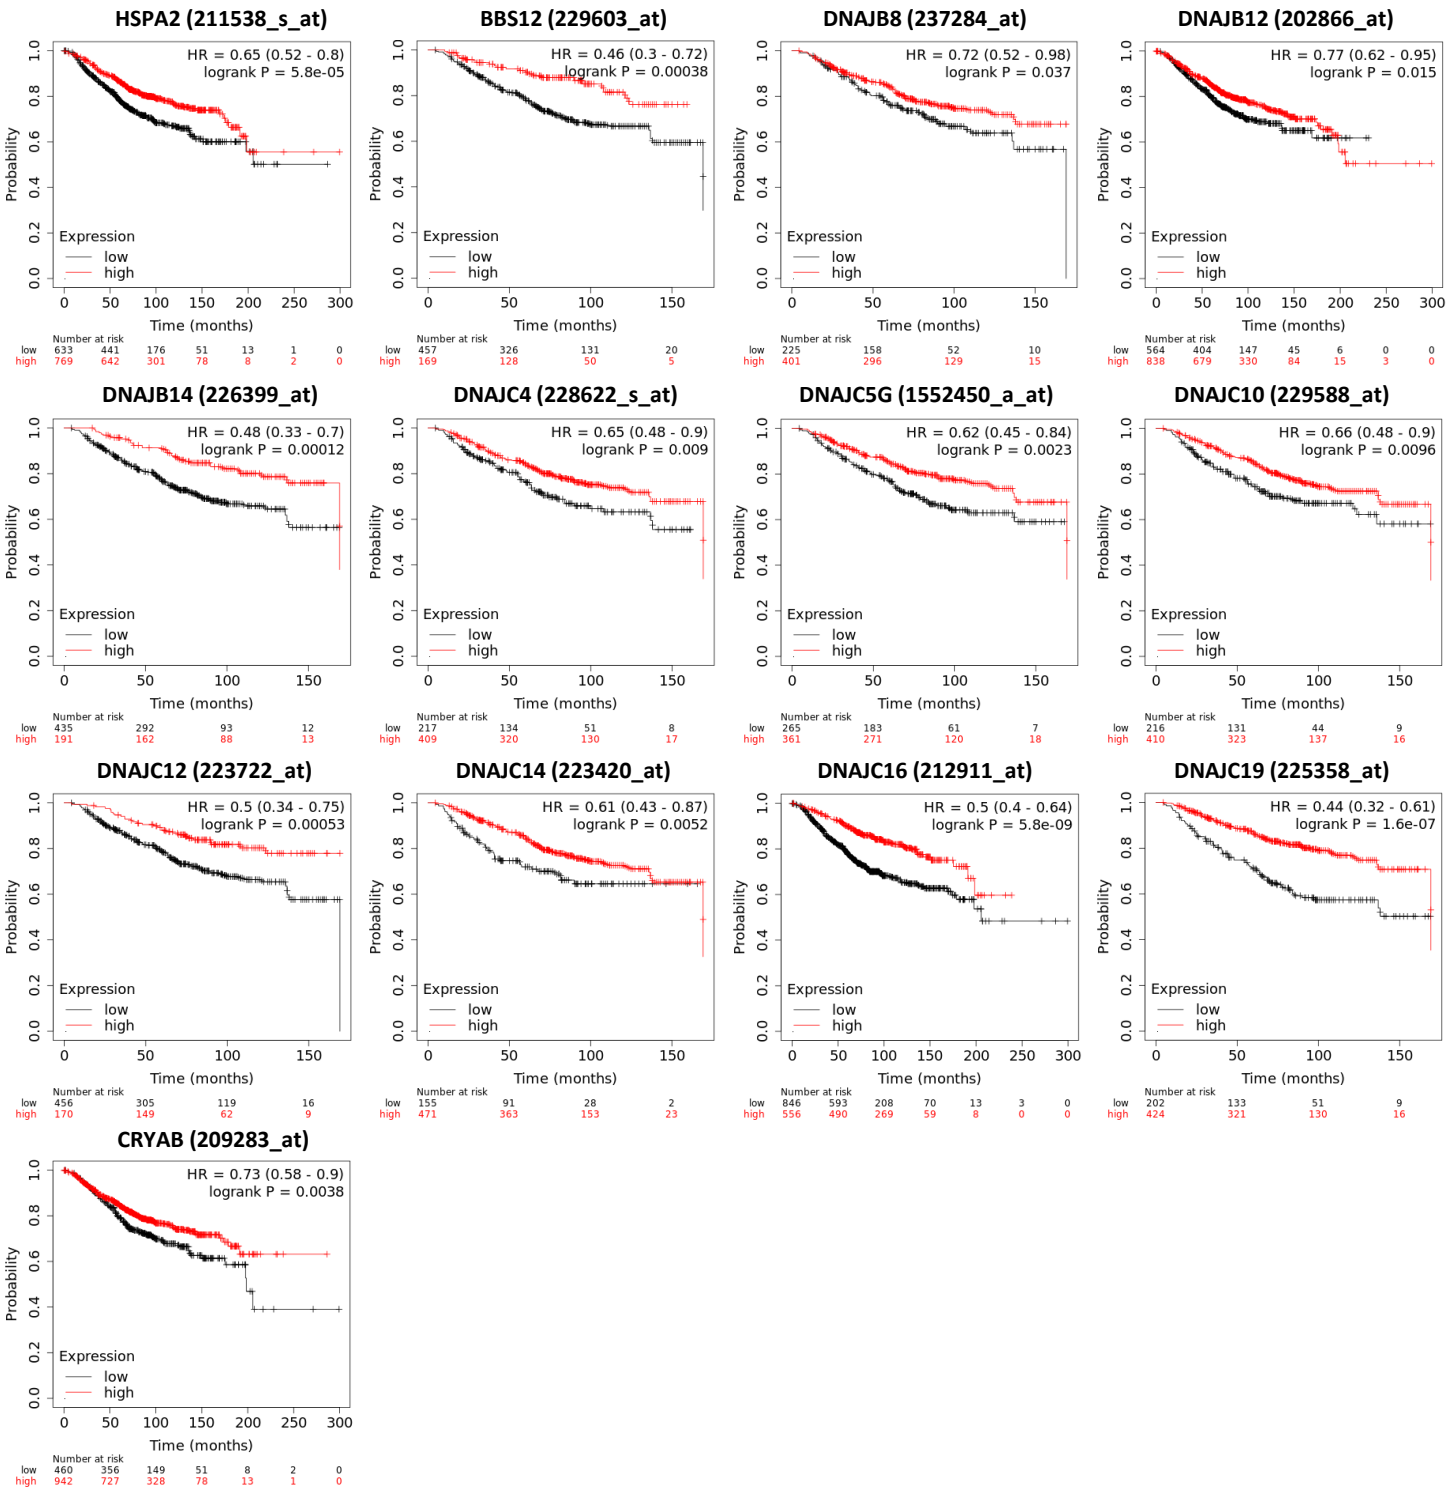

Figure S2

F

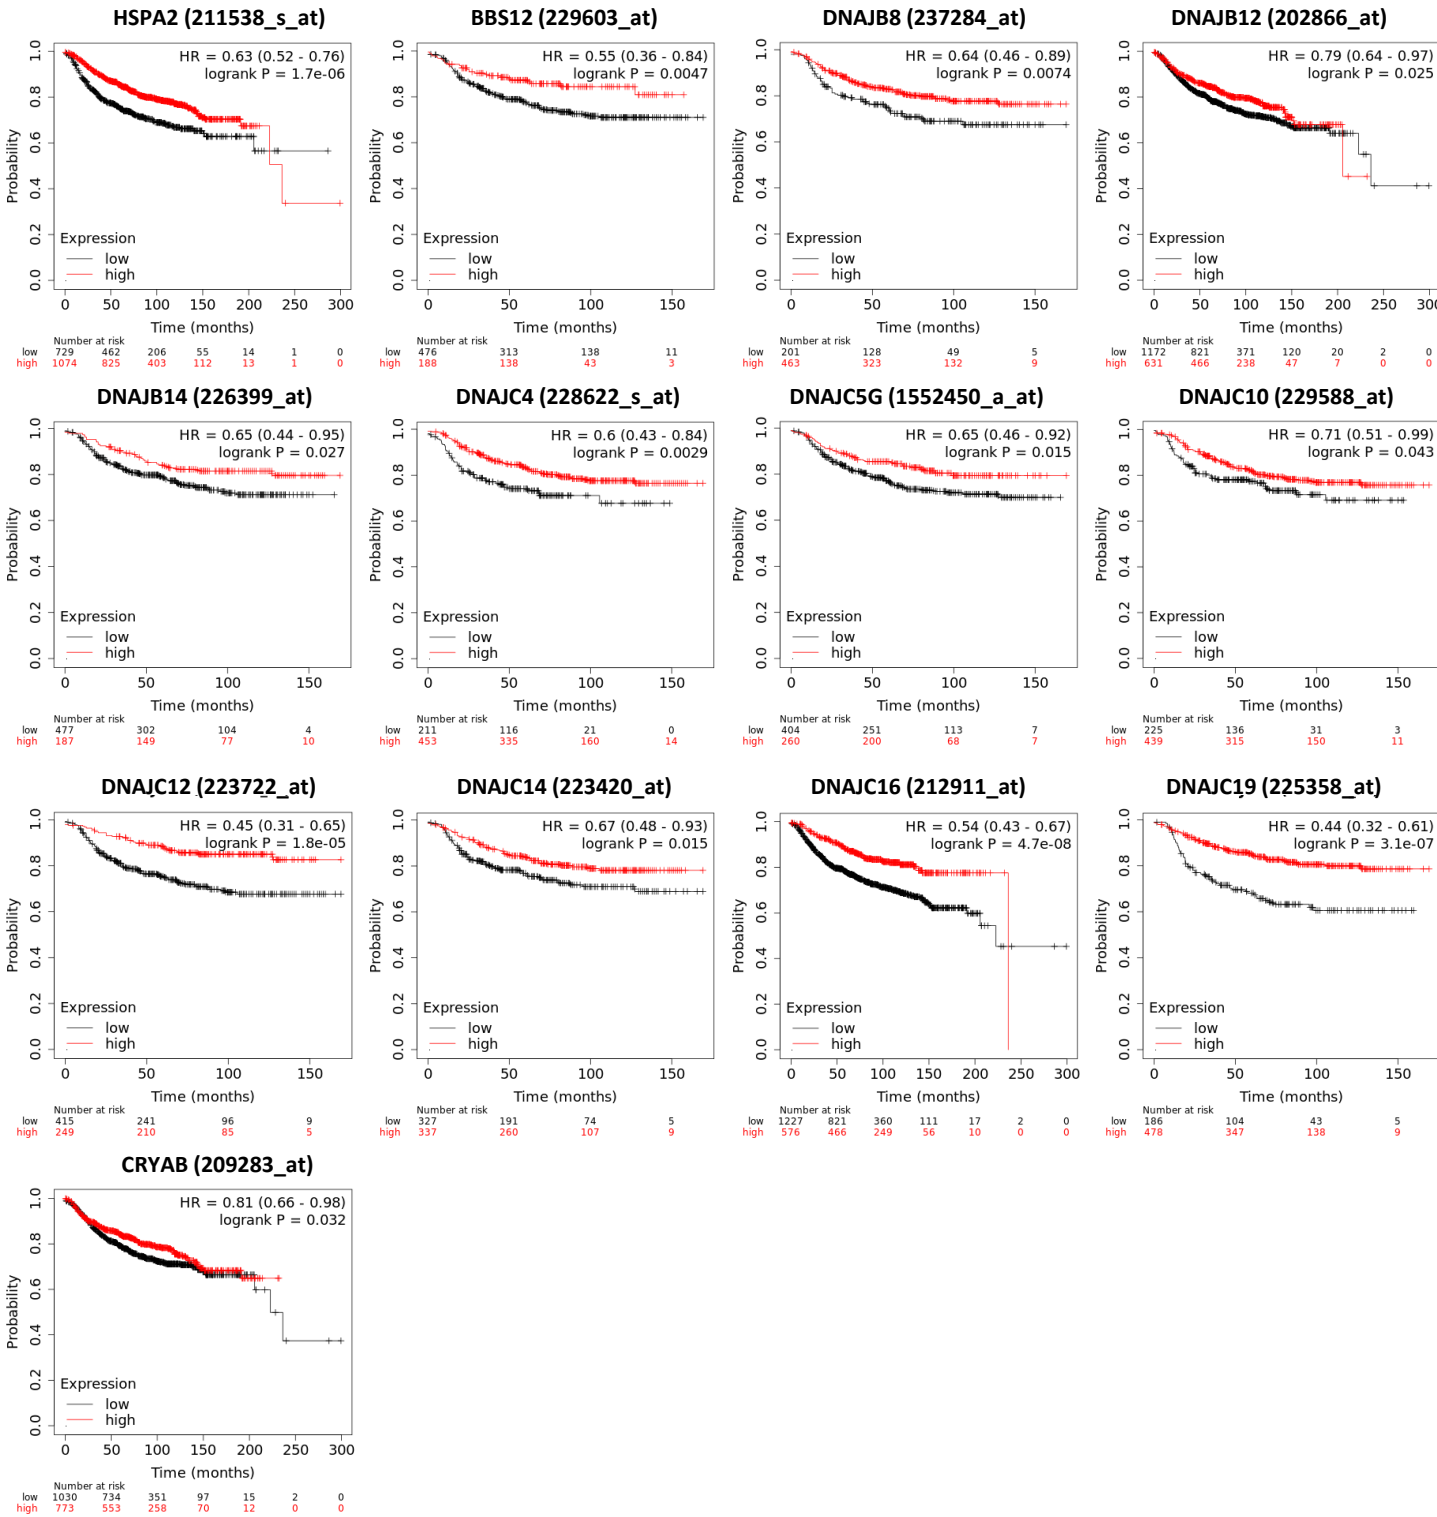

Supplement: s1 [file s1]

Figure S3

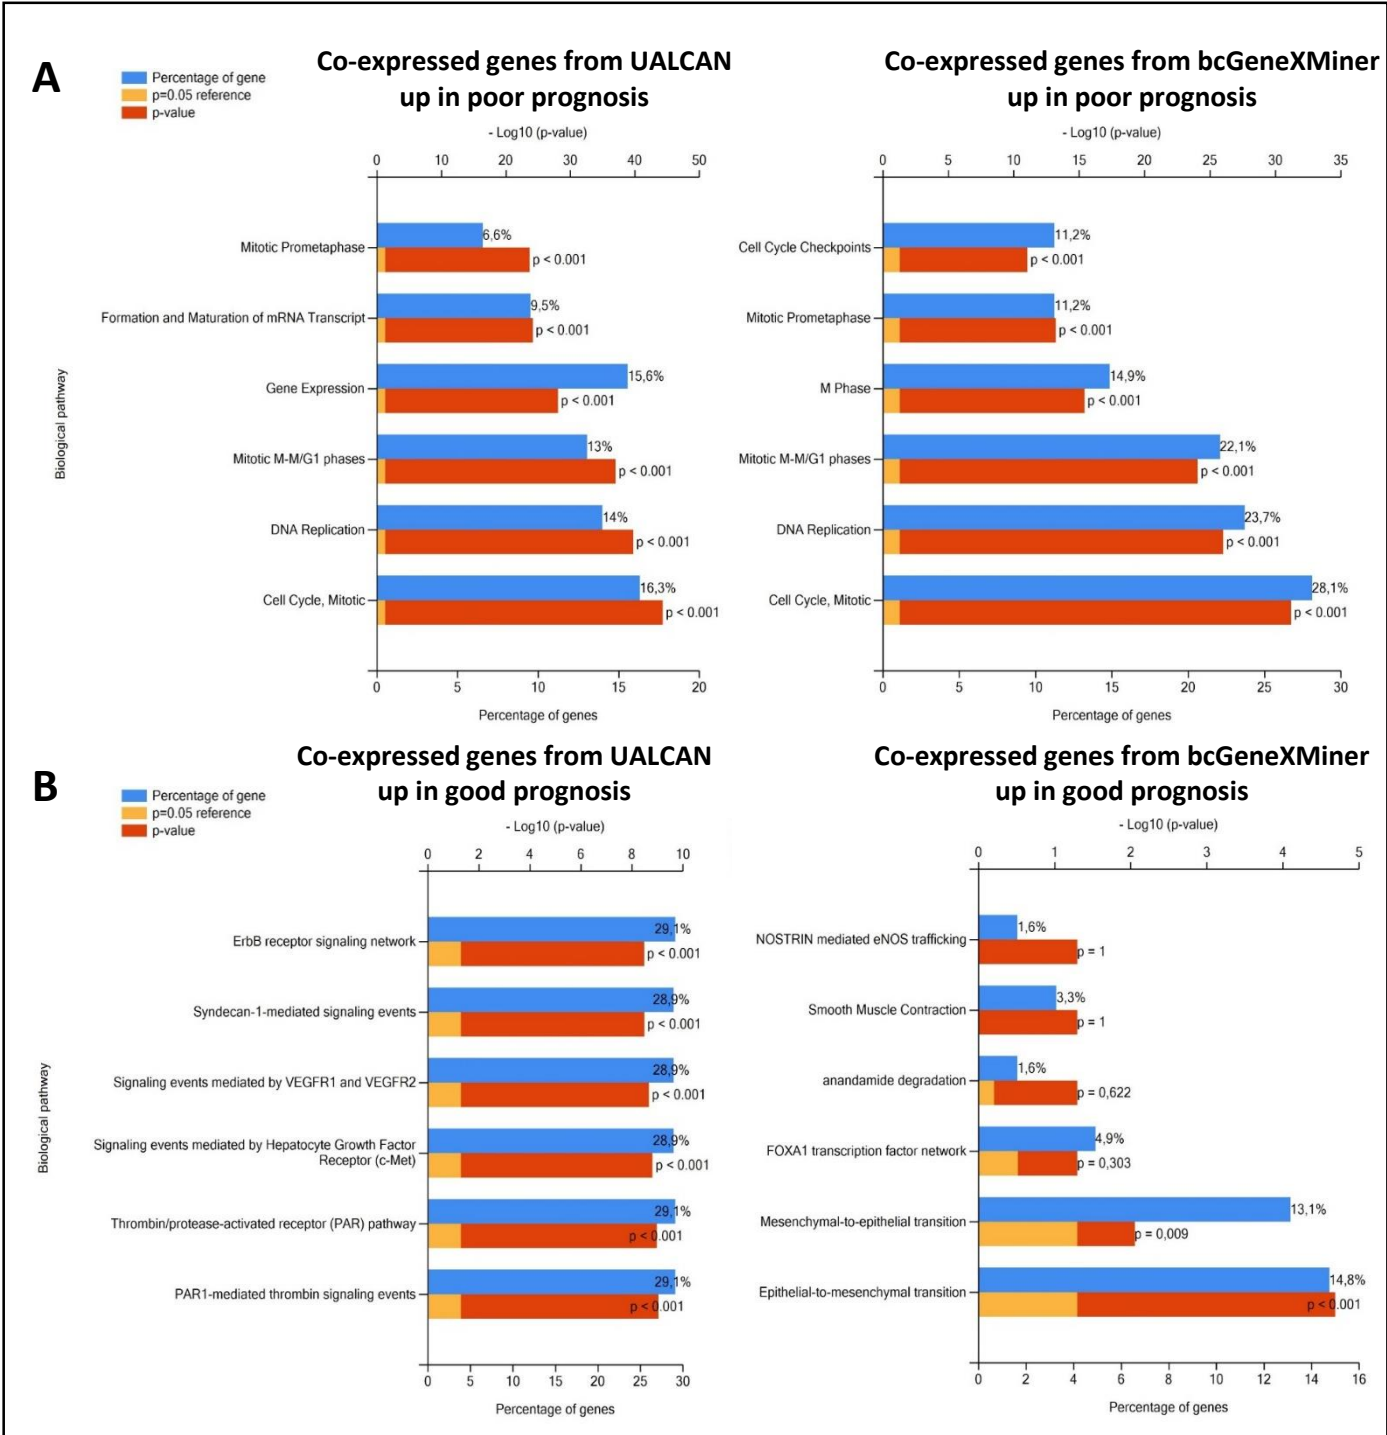

Supplement: s1 [file s1]
